# Supplementary material for: A seven-coordinate Mn(ii) complex with a pyridine-based 15-membered macrocyclic ligand containing one acetate pendant arm: structure, stability and relaxation properties
Source: Royal Society of Chemistry journal article supplement (doi:10.1039/d3dt00701d), 2023-01-01
Supplement: d3dt00701d1.pdf [file d3dt00701d1.pdf]

## Supporting information

for

### Seven-coordinate Mn(II) complex with a pyridine-based 15-membered macrocyclic ligand containing one acetate pendant arm: structure, stability and relaxation properties

*Marie Pražáková,<sup>a</sup> Daouda Ndiaye,<sup>b</sup> Éva Tóth<sup>b</sup> and Bohuslav Drahoš<sup>a</sup>*

<sup>a</sup> Department of Inorganic Chemistry, Faculty of Science, Palacký University Olomouc, 17. listopadu 12, 771 46 Olomouc, Czech Republic, Fax: +420 585 634 954. Tel: +420 585 634 429. E-mail: bohuslav.drahos@upol.cz

<sup>b</sup> Centre de Biophysique Moléculaire, UPR 4301, CNRS, rue Charles Sadron, 45071 Orléans, France, Fax: +33-23863151. E-mail: eva.jakabioth@cnrs-orleans.fr

#### Table of contents:

**Figure S1** Mass spectrum of studied ligand **L1**.

**Figure S2** <sup>1</sup>H NMR spectrum of studied ligand **L1**.

**Figure S3** <sup>13</sup>C NMR spectrum of studied ligand **L1**.

**Figure S4** HMQC spectrum of studied ligand **L1**.

**Figure S5** HMBC spectrum of studied ligand **L1**.

**Figure S6** Crystal packing of complex **1**.

**Figure S7** . Potentiometric titration curves for ligand **L1** in the absence and in the presence of selected divalent metal ions.

**Figure S8** Dependence of the observed dissociation rate constants for **MnL1** on Zn<sup>2+</sup> concentration.

**Table S1** Selected non-covalent contact parameters for complexes **1**.

F: ITMS + c ESI Full ms [50,00-2000,00]

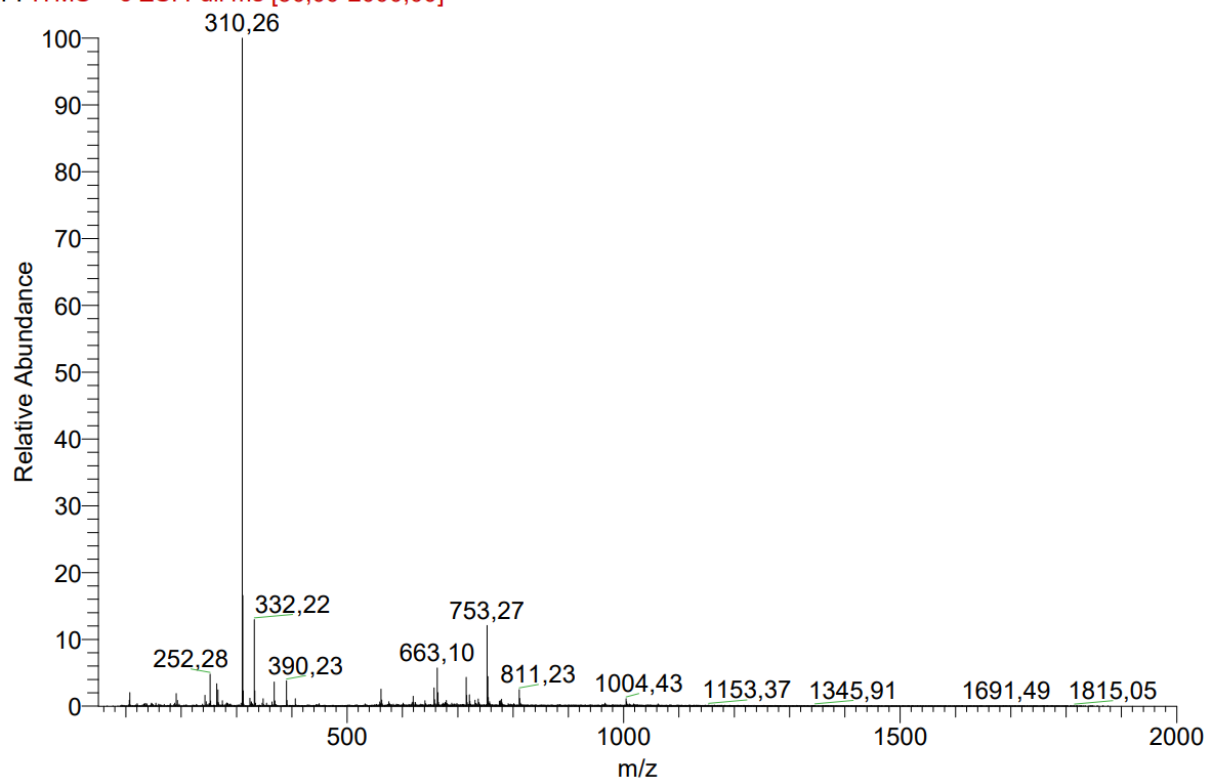

**Figure S1.** ESI mass spectrum of studied ligand **L1** (positive mode).

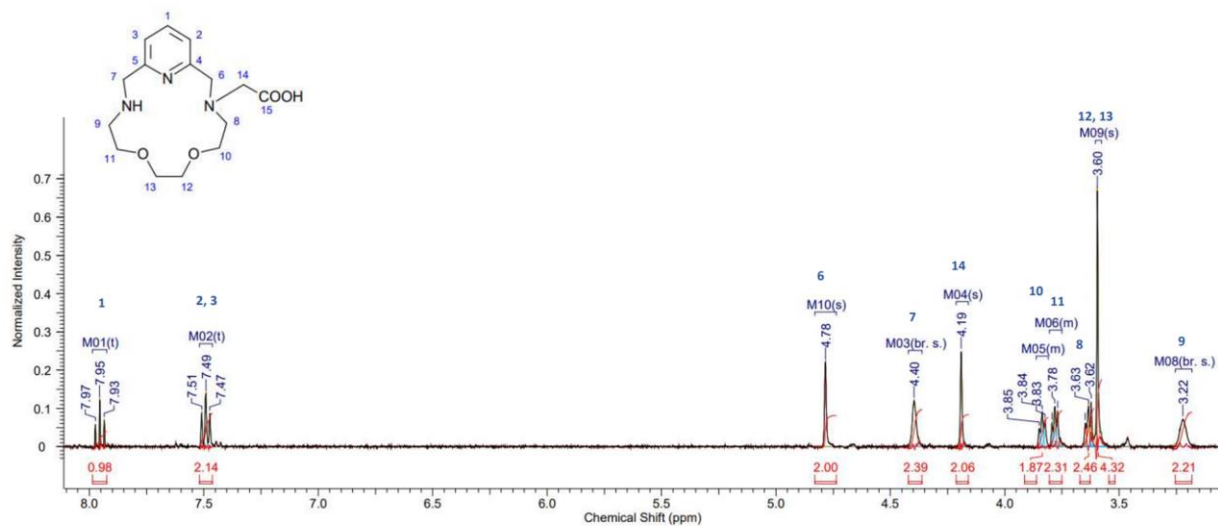

**Figure S2.** <sup>1</sup>H NMR spectrum (400 MHz, dms0-*d*<sub>6</sub>; 60 °C) of studied ligand L1.

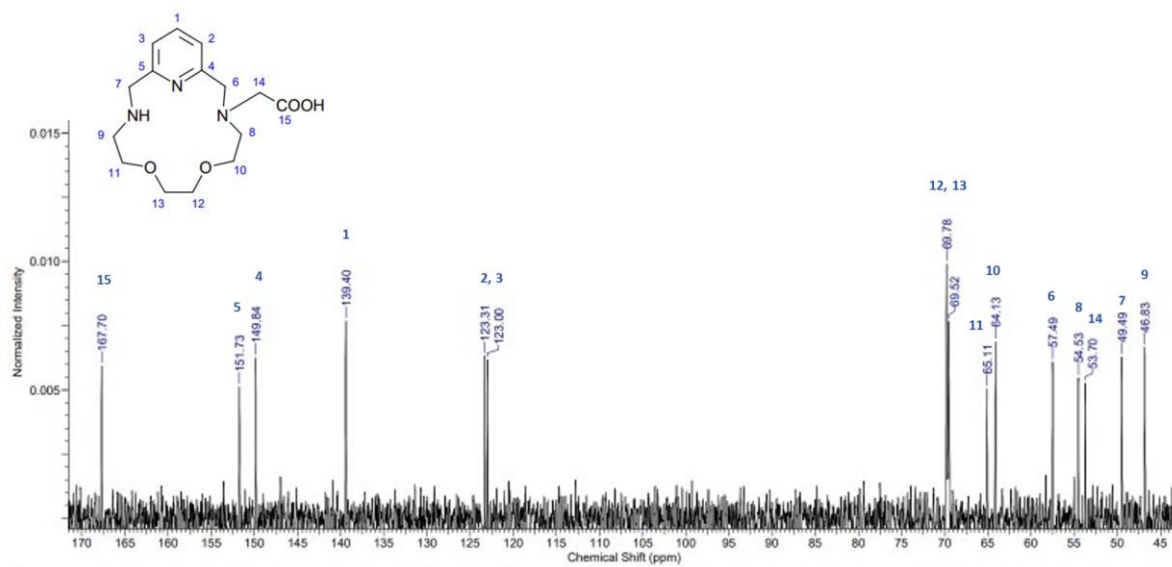

**Figure S3.**  $^{13}\text{C}$  NMR spectrum (400 MHz,  $\text{dms-}d_6$ ) of studied ligand L1.

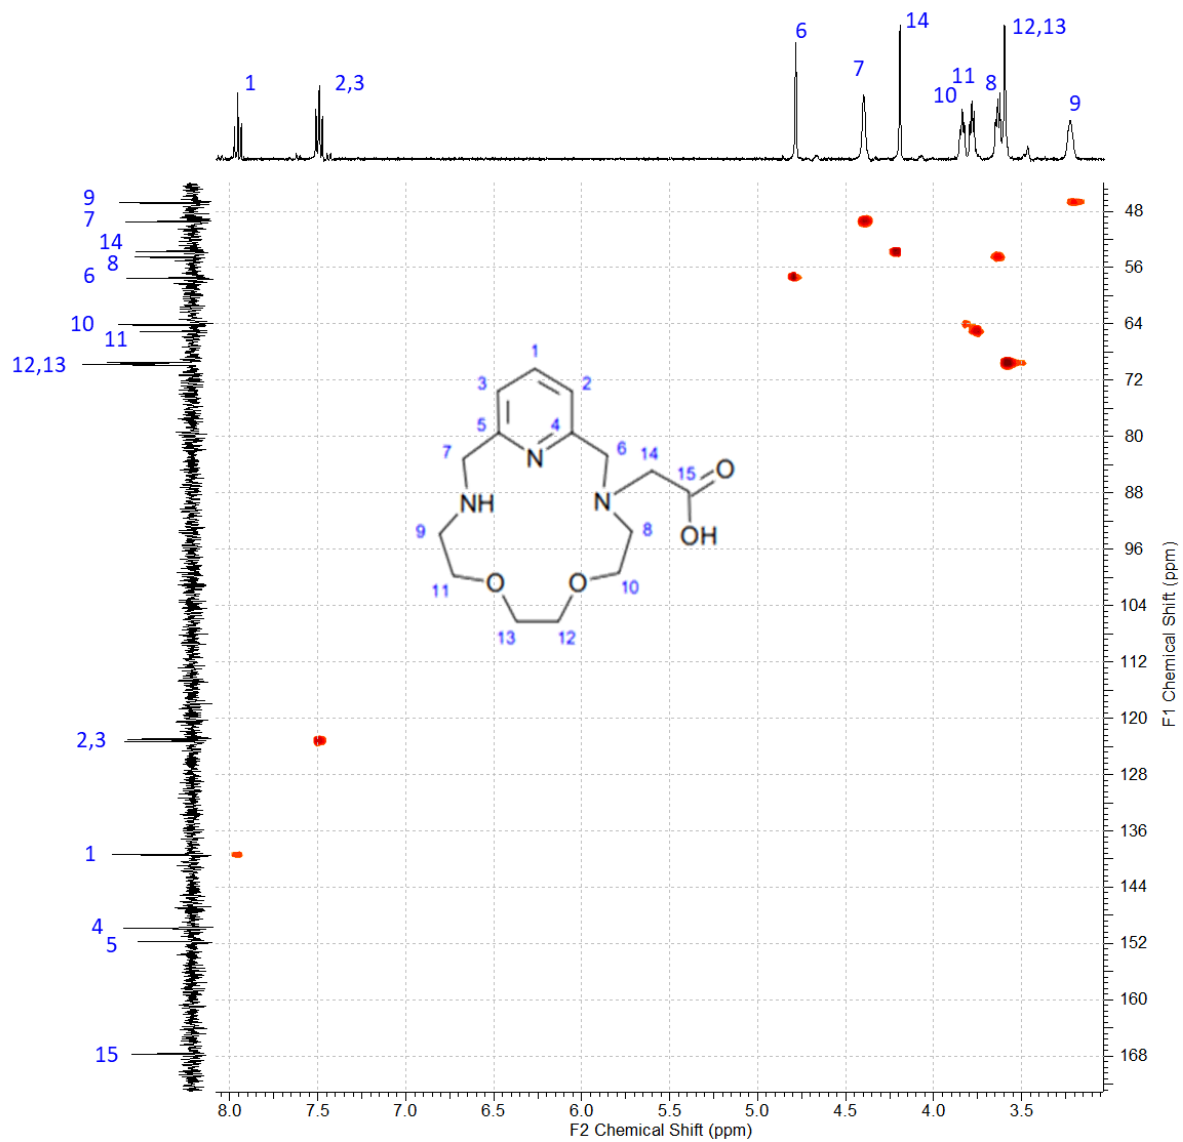

**Figure S4.**  $^1\text{H}$ - $^{13}\text{C}$  HMQC NMR spectrum (400 MHz,  $\text{dms}\text{-}d_6$ ) of studied ligand **L1**

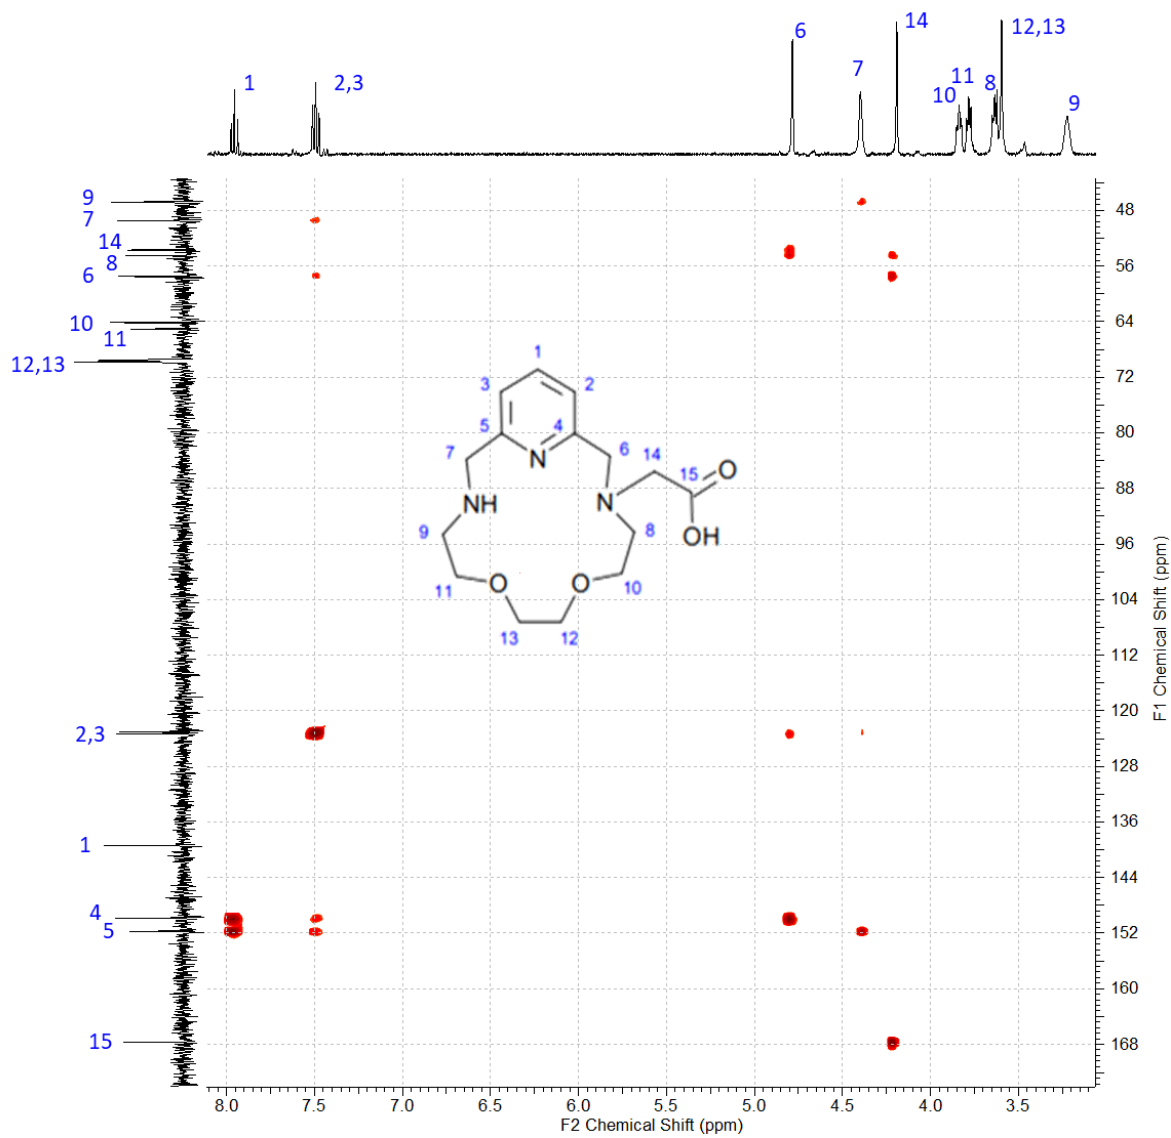

**Figure S5.**  $^1\text{H}$ - $^{13}\text{C}$  HMBC NMR spectrum (400 MHz,  $\text{dms}\text{-}d_6$ ) of studied ligand **L1**

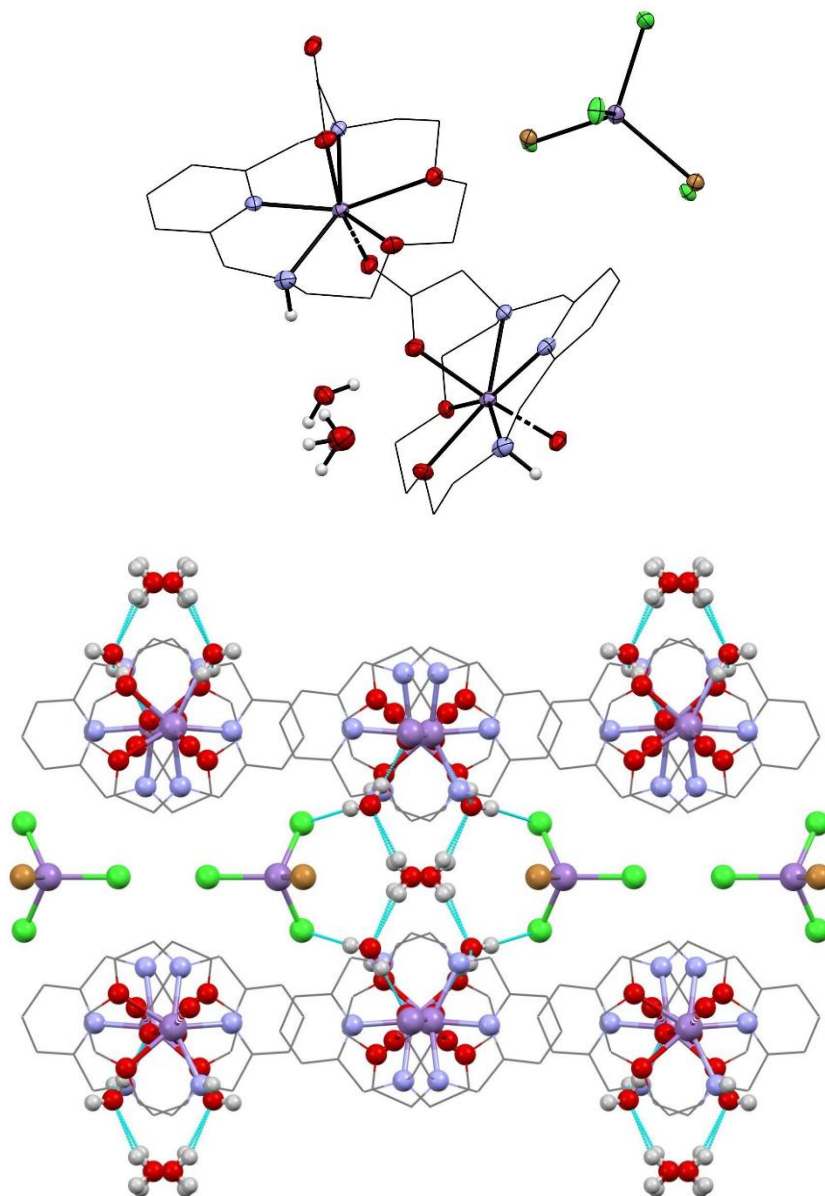

**Figure S6.** The crystal packing of complex **1**. View of the asymmetric unit (*top*) and view of the supramolecular 1D chains along a axis (*bottom*). Blue dashed lines represent hydrogen bonds. Hydrogen atoms were omitted for clarity.

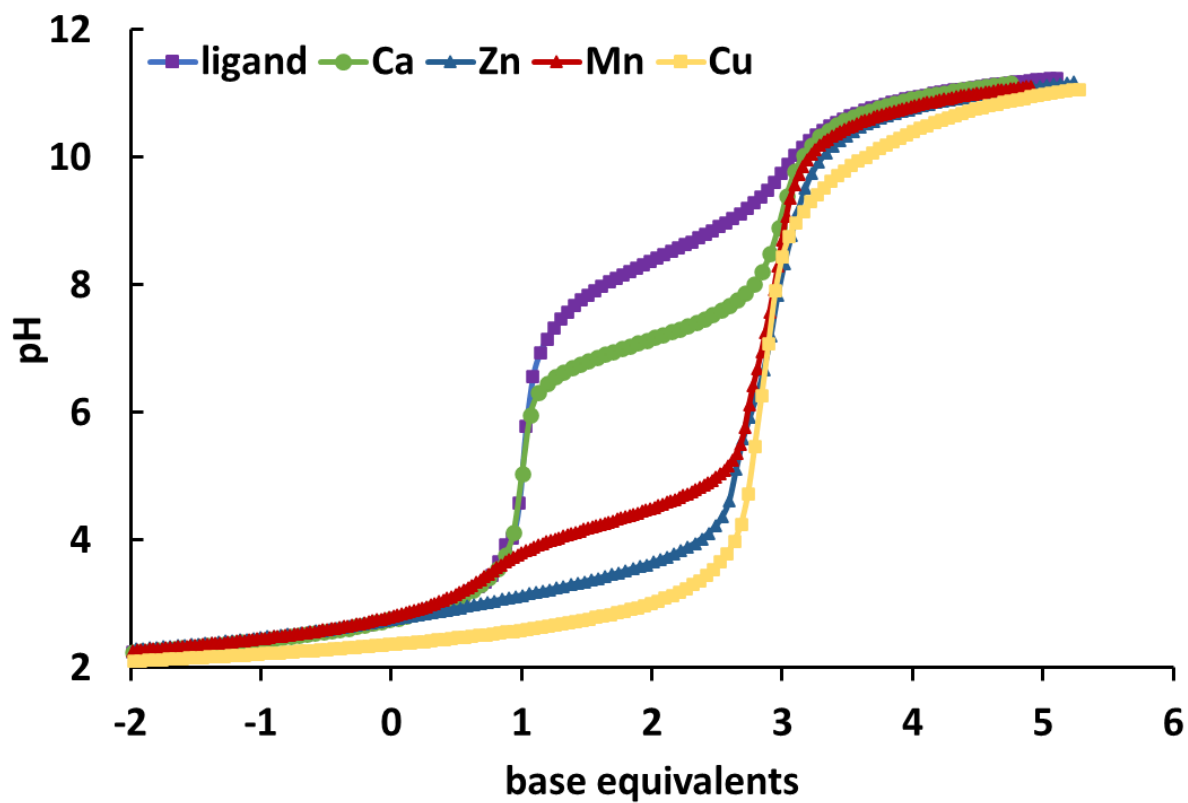

**Figure S7.** Potentiometric titration curves, as a dependence of pH on base equivalents, obtained for ligand **L1** in the absence and in the presence of selected divalent metal ions ( $I = 0.15\text{M}$ ;  $25\text{ }^\circ\text{C}$ ).



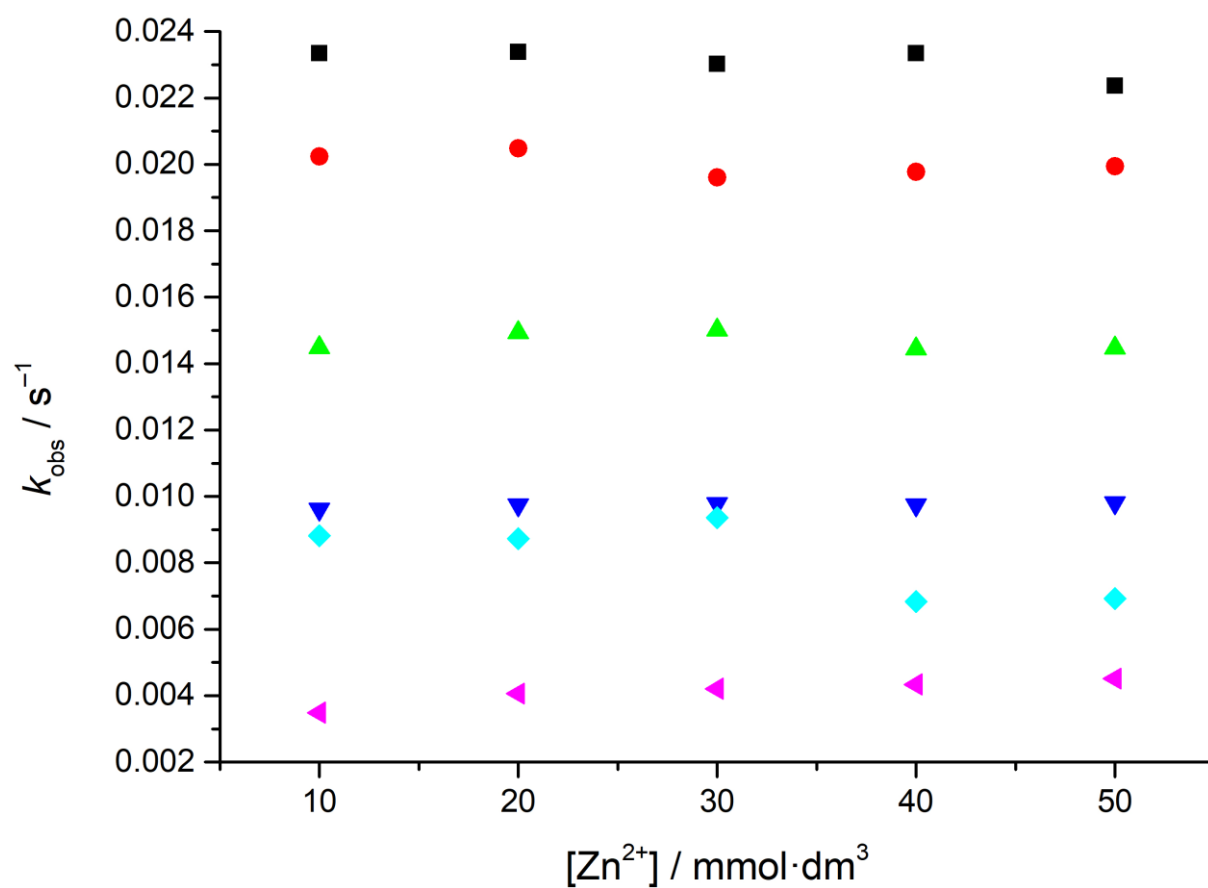

**Figure S8.** Dependence of the observed dissociation rate constants for **MnL1** on  $\text{Zn}^{2+}$  concentration. pH readings from the top are 4.9 (*black*), 5.0 (*red*), 5.2 (*green*), 5.5 (*dark blue*), 5.7 (*light blue*) and 6.1 (*pink*).

**Table S1** Selected non-covalent contact parameters (Å, °) for complexes 1.

| <b>D</b> | <b>H</b> | <b>A</b>         | <b>d(D-H)</b> | <b>d(H···A)</b> | <b>d(D···A)</b> | <b>&lt;(D-H-A)</b> |
|----------|----------|------------------|---------------|-----------------|-----------------|--------------------|
| O5       | H5A      | O3               | 0.87          | 1.91            | 2.771(4)        | 169.9              |
| O5       | H5B      | Cl1 <sup>1</sup> | 0.87          | 2.33            | 3.194(3)        | 171.9              |
| O6       | H6C      | O5               | 0.87          | 2.21            | 2.918(3)        | 138.9              |
| O6       | H6D      | O5 <sup>2</sup>  | 0.87          | 2.22            | 2.918(3)        | 136.8              |
| N3       | H3       | O5 <sup>3</sup>  | 1.00          | 2.06            | 2.991(4)        | 153.7              |

Symmetry transformations used to generate equivalent atoms:

<sup>1</sup> 1/2-X, -1/2+Y, -1/2+Z; <sup>2</sup> +X, 1/2-Y, +Z; <sup>3</sup> 1/2+X, +Y, 3/2-Z

## Analysis of the $^{17}\text{O}$ NMR and $^1\text{H}$ NMRD data<sup>1</sup>

The reduced transverse  $^{17}\text{O}$  relaxation rates,  $1/T_{2r}$ , and reduced  $^{17}\text{O}$  chemical shifts,  $\omega_r$ , are calculated from the measured relaxation rates  $1/T_2$  and angular frequencies  $\omega$  of the paramagnetic solutions and from the relaxation rates  $1/T_{2A}$  and angular frequencies  $\omega_A$  of the diamagnetic reference according to the Equations (S1) and (S2)<sup>2</sup>:

$$\frac{1}{T_{2r}} = \frac{1}{P_m} \left[ \frac{1}{T_2} - \frac{1}{T_{2A}} \right] = \frac{1}{\tau_m} \frac{T_{2m}^{-2} + \tau_m^{-1} T_{2m}^{-1} + \Delta\omega_m^2}{(\tau_m^{-1} + T_{2m}^{-1})^2 + \Delta\omega_m^2} \quad (\text{S1})$$

$$\Delta\omega_r = \frac{1}{P_m} (\omega - \omega_A) = \frac{\Delta\omega_m}{(1 + \tau_m T_{2m}^{-1})^2 + \tau_m^2 \Delta\omega_m^2} \quad (\text{S2})$$

$\Delta\omega_m$  is determined by the hyperfine or scalar coupling constant,  $A_0/\hbar$ , where  $B$  represents the magnetic field,  $S$  is the electron spin and  $g_L$  is the isotropic Landé  $g$  factor (Equation (S3)).

$$\Delta\omega_m = \frac{g_L \mu_B S(S+1) B A_0}{3k_B T \hbar} \quad (\text{S3})$$

The chemical shifts are measured with high errors (given the large linewidths) and the reduced chemical shifts were not further used in the fit.

The  $^{17}\text{O}$  transverse relaxation rate is mainly determined by the scalar contribution,  $1/T_{2sc}$ , and it is given by Equation (S4).

$$\frac{1}{T_{2m}} \cong \frac{1}{T_{2sc}} = \frac{S(S+1)}{3} \left( \frac{A_0}{\hbar} \right)^2 \left( \tau_{s1} + \frac{\tau_{s2}}{1 + \tau_{s2}^2 \omega_s^2} \right) \quad \frac{1}{\tau_{si}} = \frac{1}{\tau_m} + \frac{1}{T_{ie}} \quad (\text{S4})$$

The exchange rate,  $k_{ex}$ , (or inverse binding time,  $\tau_m$ ) of the inner sphere water molecule is assumed to obey the Eyring equation (Equation (S5)) where  $\Delta S^\ddagger$  and  $\Delta H^\ddagger$  are the entropy and enthalpy of activation for the exchange, and  $k_{ex}^{298}$  is the exchange rate at 298.15 K.

$$\frac{1}{\tau_m} = k_{ex} = \frac{k_B T}{h} \exp \left\{ \frac{\Delta S^\ddagger}{R} - \frac{\Delta H^\ddagger}{RT} \right\} = \frac{k_{ex}^{298} T}{298.15} \exp \left\{ \frac{\Delta H^\ddagger}{R} \left( \frac{1}{298.15} - \frac{1}{T} \right) \right\} \quad (\text{S5})$$

The electronic relaxation is mainly governed by modulation of the transient zero-field splitting, and for the electron spin relaxation rates,  $1/T_{1e}$  and  $1/T_{2e}$ , McMachlan has developed Equations (S6)–(S8):

$$\left( \frac{1}{T_{1e}} \right) = \frac{32}{25} \Delta^2 \left( \frac{\tau_v}{1 + \omega_S^2 \tau_v^2} + \frac{4\tau_v}{1 + 4\omega_S^2 \tau_v^2} \right) \quad (\text{S6})$$

$$\left( \frac{1}{T_{2e}} \right) = \frac{32}{50} \Delta^2 \left[ 3\tau_v + \frac{5\tau_v}{1 + \omega_S^2 \tau_v^2} + \frac{2\tau_v}{1 + 4\omega_S^2 \tau_v^2} \right] \quad (\text{S7})$$

$$\tau_v = \tau_v^{298} \exp\left\{\frac{E_v}{R} \left(\frac{1}{T} - \frac{1}{298.15}\right)\right\} \quad (\text{S8})$$

where  $\Delta^2$  is the trace of the square of the transient zero-field-splitting (ZFS) tensor,  $\tau_v$  is the correlation time for the modulation of the ZFS with the activation energy  $E_v$ , and  $\omega_s$  is the Larmor frequency of the electron spin.

The proton relaxivities (normalized to 1 mM  $\text{Mn}^{2+}$  concentration) originate from inner- and outer-sphere contributions (Equation (S9)):

$$r_1 = r_{1is} + r_{1os} \quad (\text{S9})$$

The inner-sphere term is given by Equation (S10), where  $q$  is the number of inner-sphere water molecules.

$$r_{1is} = \frac{1}{1000} \times \frac{q}{55.55} \times \frac{1}{T_{1m}^H + \tau_m} \quad (\text{S10})$$

In the longitudinal relaxation rate of inner sphere water protons,  $1/T_{1m}^H$ , the dipolar contribution dominates (Equation (S11)):

$$\frac{1}{T_{1m}^H} \cong \frac{1}{T_1^{DD}} = \frac{2}{15} \left(\frac{\mu_0}{4\pi}\right)^2 \frac{\hbar^2 \gamma_S^2 \gamma_I^2}{r_{MnH}^6} S(S+1) \left[ \frac{3\tau_{d1H}}{1 + \omega_I^2 \tau_{d1H}^2} + \frac{7\tau_{d2H}}{1 + \omega_S^2 \tau_{d2H}^2} \right] \quad (\text{S11})$$

Here  $r_{MnH}$  is the effective distance between the  $\text{Mn}^{2+}$  electron spin and the water protons,  $\omega_i$  is the proton resonance frequency,  $\tau_{diH}$  is given by Eq. S12, where  $\tau_{RH}$  is the rotational correlation time of the  $\text{Mn}^{2+}$ - $\text{H}_{\text{water}}$  vector:

$$\frac{1}{\tau_{diH}} = \frac{1}{\tau_m} + \frac{1}{\tau_{RH}} + \frac{1}{T_{ie}} \quad i = 1, 2; \quad (\text{S12})$$

No scalar relaxation term was included in the analysis, as the NMRD profiles did not present a second, low-field dispersion, typical of an important scalar contribution to relaxivity.<sup>1</sup>

The outer-sphere contribution to the overall relaxivity is described by Equation (S13), where  $N_A$  is the Avogadro constant, and  $J_{os}$  is a spectral density function (Equation (S14)).

$$r_{1os} = \frac{32 N_A \pi}{405} \left(\frac{\mu_0}{4\pi}\right)^2 \frac{\hbar^2 \gamma_S^2 \gamma_I^2}{a_{MnH} D_{MnH}} S(S+1) [3J_{os}(\omega_I, T_{1e}) + 7J_{os}(\omega_S, T_{2e})] \quad (\text{S13})$$

$$J_{os}(\omega, T_{je}) = \text{Re} \left[ \frac{1 + \frac{1}{4} \left( i\omega\tau_{\text{MnH}} + \frac{\tau_{\text{MnH}}}{T_{je}} \right)^{1/2}}{1 + \left( i\omega\tau_{\text{MnH}} + \frac{\tau_{\text{MnH}}}{T_{je}} \right)^{1/2} + \frac{4}{9} \left( i\omega\tau_{\text{MnH}} + \frac{\tau_{\text{MnH}}}{T_{je}} \right) + \frac{1}{9} \left( i\omega\tau_{\text{MnH}} + \frac{\tau_{\text{MnH}}}{T_{je}} \right)^{3/2}} \right]$$

$j = 1, 2$  (S14)

The diffusion coefficient for the diffusion of a water proton away from a  $\text{Mn}^{2+}$  complex,  $D_{\text{MnH}}$ , obeys the exponential temperature dependence described by Equation (S15), with activation energy  $E_{\text{MnH}}$ :

$$D_{\text{MnH}} = D_{\text{MnH}}^{298} \exp \left\{ \frac{E_{\text{MnH}}}{R} \left( \frac{1}{298.15} - \frac{1}{T} \right) \right\}$$

(S15)

In the fitting procedure, some parameters have been fixed to common values: the distance between the metal ion and the inner and outer sphere water protons ( $r_{\text{MnH}} = 2.83 \text{ \AA}$  and  $a_{\text{MnH}} = 3.6 \text{ \AA}$ , respectively); the diffusion coefficient and its activation energy ( $D_{\text{MnH}} = 26 \times 10^{-10} \text{ m}^2\text{s}^{-1}$  and  $E_{\text{MnH}} = 20 \text{ kJ mol}^{-1}$ ).

---

<sup>1</sup> E. Balogh, Z. He, W. Hsieh, S. Liu, É. Tóth; *Inorg. Chem.* 2007, **46**, 238-250.

<sup>2</sup> T. J. Swift, R. E. Connick, *J.Chem.Phys.* 1962, **37**, 2, 307-320.
